# Supplementary Information for “Inference of RNA Polymerase II Transcription Dynamics from Chromatin Immunoprecipitation Time Course Data”

Ciira wa Maina, Antti Honkela, Filomena Matarese, Korbinian Grote, Hendrik G. Stunnenberg, George Reid, Neil D. Lawrence, and Magnus Rattray

## Priors

The parameters  $\Theta = \{\sigma_f, \ell_f, \{\alpha_i, D_i, \ell_i, \sigma_i\}_{i=1}^I\}$  are positive and bounded. In the experiments we use the bounds shown in Table S1 with  $D_1$  fixed at zero,  $\sigma_f = 1$  and the values  $\sigma_i$  tied to single value. To determine the delay bounds, we assume that the value of  $D_i$  is an indicator of how long it takes the ‘transcription wave’ to reach the corresponding gene segment. That is  $D_2$  is the amount of time it takes to transcribe 20% of the gene,  $D_3$  40% etc. We obtain the length  $L$  of the gene from the hg19 annotation and use values of maximum and minimum expected speed ( $s_{min}$  and  $s_{max}$  respectively) to compute the delay bound. For example

$$D_2^{min} = \frac{0.2L}{s_{max}} \quad \text{and} \quad D_2^{max} = \frac{0.2L}{s_{min}}$$

We use  $s_{min} = 50 \text{ bp min}^{-1}$  and  $s_{max} = 50 \text{ kbp min}^{-1}$ . These large bounds allow unbiased estimation of transcription speed. (Recent work on individual cells suggests speeds as high as 50kb per minute are possible [1].)

We transform the parameters using a logit transform and work with unconstrained variables. For a parameter  $\theta \in \Theta$  with corresponding minimum and maximum bounds  $\theta_{min}$  and  $\theta_{max}$  respectively we compute the transformed variable  $\gamma$

$$\gamma = \log\left(\frac{\theta - \theta_{min}}{\theta_{max} - \theta}\right). \quad (1)$$

We place a Gaussian prior over the parameters in the transformed domain and draw samples from the posterior using the Hamiltonian Monte Carlo (HMC) algorithm [2]. We have

$$\gamma \sim \mathcal{N}(\gamma|0, \sigma_\gamma). \quad (2)$$

With  $\sigma_\gamma = 2$  we obtain an approximately uniform prior in the untransformed domain yielding an uninformative prior.

To initialise the parameters for gradient optimisation, the length scales  $\ell_f$  and  $\ell_i$  are initialised at random from  $\{10, 20, 30, 40, 80\}$ ,  $\alpha_i$  and  $\sigma_i$  are drawn from  $\mathcal{U}[0, 1]$  with the value of  $\sigma_i$  multiplied by 100 to avoid local minima that would under-estimate the variance. The delays are initialised at random with the more realistic speed bounds  $s_{min}=500 \text{ bp per min}$  and  $s_{max} = 5\text{kb per min}$  when an ensemble of cells is considered. The parameters are then freely optimised with the bounds given in Table S1.

| Parameter  | Minimum                         | Maximum                         |
|------------|---------------------------------|---------------------------------|
| $\ell_f$   | 5 min                           | 320 min                         |
| $\alpha_i$ | 0                               | 100                             |
| $D_i$      | $\frac{0.2(i-1)L}{s_{max}}$ min | $\frac{0.2(i-1)L}{s_{min}}$ min |
| $\ell_f$   | 5 min                           | 320 min                         |
| $\sigma_i$ | 0                               | 100                             |

Table S1: Parameter bounds.

## Parameter gradients

To obtain ML estimates of the parameters we maximise the log marginal likelihood. To do this we require the gradients of the covariance function w.r.t the parameters. The gradients w.r.t  $\alpha_i$  and  $\sigma_i$  are straight forward. Here we give the expressions for the gradients of  $\text{cov}[y_i(t), y_j(t')] = K_{yy}$  w.r.t  $\ell_f$ ,  $\ell_i$  and  $D_i$ . We have

$$\begin{aligned} \frac{\partial K_{yy}}{\partial \ell_f} &= \alpha_i \alpha_j \frac{\sigma_f^2 (\ell_i^2 + \ell_j^2)}{(\ell_f^2 + \ell_i^2 + \ell_j^2)^{\frac{3}{2}}} \exp\left(-\frac{(t' - t + D_i - D_j)^2}{2(\ell_f^2 + \ell_i^2 + \ell_j^2)}\right) \\ &+ \alpha_i \alpha_j \frac{\sigma_f^2 \ell_f}{\sqrt{\ell_f^2 + \ell_i^2 + \ell_j^2}} \exp\left(-\frac{(t' - t + D_i - D_j)^2}{2(\ell_f^2 + \ell_i^2 + \ell_j^2)}\right) \frac{(t' - t + D_i - D_j)^2}{(\ell_f^2 + \ell_i^2 + \ell_j^2)^2} \end{aligned} \quad (3)$$

$$\begin{aligned} \frac{\partial K_{yy}}{\partial \ell_i} &= -\alpha_i \alpha_j \frac{\sigma_f^2 \ell_f \ell_i}{(\ell_f^2 + \ell_i^2 + \ell_j^2)^{\frac{3}{2}}} \exp\left(-\frac{(t' - t + D_i - D_j)^2}{2(\ell_f^2 + \ell_i^2 + \ell_j^2)}\right) \\ &+ \alpha_i \alpha_j \frac{\sigma_f^2 \ell_f}{\sqrt{\ell_f^2 + \ell_i^2 + \ell_j^2}} \exp\left(-\frac{(t' - t + D_i - D_j)^2}{2(\ell_f^2 + \ell_i^2 + \ell_j^2)}\right) \frac{\ell_i (t' - t + D_i - D_j)^2}{(\ell_f^2 + \ell_i^2 + \ell_j^2)^2} \end{aligned} \quad (4)$$

$$\frac{\partial K_{yy}}{\partial D_i} = -\alpha_i \alpha_j \frac{\sigma_f^2 \ell_f}{\sqrt{\ell_f^2 + \ell_i^2 + \ell_j^2}} \exp\left(-\frac{(t' - t + D_i - D_j)^2}{2(\ell_f^2 + \ell_i^2 + \ell_j^2)}\right) \frac{(t' - t + D_i - D_j)}{(\ell_f^2 + \ell_i^2 + \ell_j^2)} \quad (5)$$

To obtain gradient w.r.t the transformed parameters given by equation 1, we employ the chain rule.

$$\begin{aligned} \frac{\partial K_{yy}}{\partial \gamma} &= \frac{\partial K_{yy}}{\partial \theta} \frac{\partial \theta}{\partial \gamma} \\ &= \frac{\partial K_{yy} \exp(\gamma) (\theta_{max} - \theta_{min})}{\partial \theta (1 + \exp(\gamma))^2} \end{aligned} \quad (6)$$

## Canonical Pathway and Gene Ontology Analysis

To determine the biological significance of the 383 genes found to fit the pol-II dynamics model well, we used the Genomatix Pathway System (GePS) to look for enriched canonical pathways and gene ontology categories. Table S2 shows the significant canonical pathways ( $p$ -value  $< 0.05$ )

and the observed genes. It is interesting to note that the pair of genes *JAK1* and *JAK2* are responsible for a large number of the significant canonical pathways. These genes have previously been suggested as potential drug targets in breast cancer (see for example [3]). The enrichment of the FOXA1 transcriptional network provides further confirmation that our model identifies biologically relevant genes. In recent work, Hurtado *et al.* [4] showed that FOXA1 influences the interaction of ER $\alpha$  and chromatin and therefore influences the response of breast cancer cells to E2. Genes in the FOXA1 canonical network found to fit the pol-II model well include *NRIP1* which is believed to be a direct E2 target that mediates the repression of ER $\alpha$  target genes later in the time course[5, 6]. Table S3 shows the top 20 significant gene ontology terms ( $p$ -value < 0.05) for molecular function.

| Canonical pathway                                           | Genes                                 |
|-------------------------------------------------------------|---------------------------------------|
| IL-6 signaling pathway(JAK1 JAK2 STAT3)                     | JAK1, JAK2                            |
| IFN gamma signaling pathway                                 | JAK1, JAK2                            |
| Proteasome complex                                          | PSME1, PSMA4, PSMB5, PSMA2            |
| IL-3 signaling pathway(JAK1 JAK2 STAT5)                     | JAK1, JAK2                            |
| Stat3 signaling pathway                                     | JAK1, JAK2                            |
| FOXA1 transcription factor network                          | AP1B1, NDUFV3, NRIP1, SHH             |
| PDGFR-alpha signaling pathway                               | JAK1, PDGFB, SHB                      |
| Hypoxia and p53 in the cardiovascular system                | FHL2, HIF1A, GADD45A                  |
| LIF signaling pathway                                       | JAK1, JAK2                            |
| IL-5 signaling pathway                                      | JAK1, JAK2                            |
| p53 signaling pathway                                       | TIMP3, GADD45A                        |
| IL-10 anti-inflammatory signaling pathway                   | JAK1, BLVRB                           |
| AndrogenReceptor                                            | SPDEF, FHL2, STUB1<br>NCOR2, NRIP1    |
| Integrin signaling pathway                                  | CSK, ACTN1, NOLC1                     |
| Erythropoietin mediated neuroprotection through NF-KB       | HIF1A, JAK2                           |
| PDGFR-beta signaling pathway                                | ACTR2, HCK, CSK,<br>PDGFB, CTTN, JAK2 |
| Mechanisms of transcriptional repression by dna methylation | RBBP7, MBD1                           |
| Hypoxia-inducible factor in the cardiovascular system       | HIF1A, LDHA                           |

Table S2: Significant canonical pathways ( $p$ -value < 0.05) for the 383 genes found to fit the pol-II dynamics model well.

Table S4 shows the significant canonical pathways ( $p$ -value < 0.01) and the observed genes in each of the 12 promoter profile clusters. We also perform a gene ontology analysis of the 12 promoter profile clusters using the DAVID tool from the NIH [7, 8]. The enriched gene ontology categories ( $p$ -value < 0.05) are shown in Table S5, (for molecular function), Table S6 (for biological processes) and Table S7 (for cellular components).

| Molecular function                                     |
|--------------------------------------------------------|
| Structural constituent of ribosome                     |
| RNA binding                                            |
| Methyl-CpG binding                                     |
| Protein binding                                        |
| Structural molecule activity                           |
| Nucleic acid binding                                   |
| rRNA binding                                           |
| Non-membrane spanning protein tyrosine kinase activity |
| Ribosomal small subunit binding                        |
| Pseudouridine synthase activity                        |
| S100 alpha binding                                     |
| Growth hormone receptor binding                        |
| Isomerase activity                                     |
| Glucocorticoid receptor binding                        |
| Translation factor activity, nucleic acid binding      |
| NF-kappaB binding                                      |
| Threonine-type peptidase activity                      |
| Threonine-type endopeptidase activity                  |
| Intramolecular transferase activity                    |

Table S3: Top 20 significant gene ontology terms ( $p$ -value  $< 0.05$ ) for the 383 genes found to fit the pol-II dynamics model well.

| Cluster | Canonical pathway                                                                                                                                                                                                                                                                                                                                       | Genes                                                                                                                                                 |
|---------|---------------------------------------------------------------------------------------------------------------------------------------------------------------------------------------------------------------------------------------------------------------------------------------------------------------------------------------------------------|-------------------------------------------------------------------------------------------------------------------------------------------------------|
| 1 (37)  | PDGFR-beta signaling pathway                                                                                                                                                                                                                                                                                                                            | PDGFB, ACTR2, HCK                                                                                                                                     |
| 2 (47)  | -                                                                                                                                                                                                                                                                                                                                                       | -                                                                                                                                                     |
| 3 (18)  | -                                                                                                                                                                                                                                                                                                                                                       | -                                                                                                                                                     |
| 4 (29)  | Nuclear receptors coordinate the activities of chromatin remodeling complexes and coactivators to facilitate initiation of transcription in carcinoma cells                                                                                                                                                                                             | NCOR2, TAF5                                                                                                                                           |
| 5 (27)  | -                                                                                                                                                                                                                                                                                                                                                       | -                                                                                                                                                     |
| 6 (40)  | -                                                                                                                                                                                                                                                                                                                                                       | -                                                                                                                                                     |
| 7 (24)  | Proteasome complex<br>Antigen processing and presentation                                                                                                                                                                                                                                                                                               | PSMB5, PSME1<br>PSMB5                                                                                                                                 |
| 8 (47)  | -                                                                                                                                                                                                                                                                                                                                                       | -                                                                                                                                                     |
| 9 (26)  | -                                                                                                                                                                                                                                                                                                                                                       | -                                                                                                                                                     |
| 10 (38) | IFN gamma signaling pathway<br>IL-6 signaling pathway<br>IL-3 signaling pathway<br>Stat3 signaling pathway<br>LIF signaling pathway<br>IL-5 signaling pathway<br>PDGFR-alpha signaling pathway<br>IL27-mediated signaling events<br>Role of ErbB2 in signal transduction and oncology<br>IL6-mediated signaling events<br>JAK_STAT_MolecularVariation_2 | JAK2, JAK1<br>JAK2, JAK1<br>JAK2, JAK1<br>JAK2, JAK1<br>JAK2, JAK1<br>JAK2, JAK1<br>SHB, JAK1<br>JAK2, JAK1<br>JAK2, JAK1<br>JAK2, JAK1<br>JAK2, JAK1 |
| 11 (13) | -                                                                                                                                                                                                                                                                                                                                                       | -                                                                                                                                                     |
| 12 (37) | -                                                                                                                                                                                                                                                                                                                                                       | -                                                                                                                                                     |

Table S4: Pathway analysis of clusters from inferred promoter activity profiles. The number in parentheses in column 1 is the cluster size.

| Cluster    | GO ID                            | GO TERM                                    |
|------------|----------------------------------|--------------------------------------------|
| 1 (37)     | GO:0008092                       | Cytoskeletal protein binding               |
|            | GO:0003779                       | Actin binding                              |
|            | GO:0005085                       | Guanyl-nucleotide exchange factor activity |
| 2 (47)     | GO:0003723                       | RNA binding                                |
| 3 (18)     | -                                | -                                          |
| 4 (29)     | GO:0003723                       | RNA binding                                |
|            | GO:0030528                       | transcription regulator activity           |
|            | GO:0003677                       | DNA binding                                |
|            | GO:0003700                       | Transcription factor activity              |
| 5 (27)     | -                                | -                                          |
| 6 (40)     | GO:0003735                       | Structural constituent of ribosome         |
| 7 (24)     | GO:0003735                       | Structural constituent of ribosome         |
|            | GO:0005198                       | Structural molecule activity               |
|            | GO:0003723                       | RNA binding                                |
| 8 (47)     | -                                | -                                          |
| 9 (26)     | GO:0043021                       | Ribonucleoprotein binding                  |
| 10 (38)    | GO:0005131                       | Growth hormone receptor binding            |
|            | GO:0051427                       | Hormone receptor binding                   |
|            | GO:0032553                       | Ribonucleotide binding                     |
|            | GO:0032555                       | Purine ribonucleotide binding              |
|            | GO:0017076                       | Purine nucleotide binding                  |
|            | GO:0005525                       | GTP binding                                |
|            | GO:0019001                       | Guanyl nucleotide binding                  |
|            | GO:0032561                       | Guanyl ribonucleotide binding              |
| GO:0004713 | Protein tyrosine kinase activity |                                            |
| 11 (13)    | -                                | -                                          |
| 12 (37)    | GO:0003735                       | Structural constituent of ribosome         |
|            | GO:0005198                       | Structural molecule activity               |
|            | GO:0003723                       | RNA binding                                |

Table S5: Enriched gene ontology categories for molecular function ( $p$ -value  $< 0.05$ ) of clusters from inferred promoter activity profiles. The number in parentheses in column 1 is the cluster size.

| Cluster | GO ID                                                                                                                                                                                                                                                                                                                | GO TERM                                                                                                                                                                                                                                                                                                                                                                                                                                                                                                                                                                                                                                                                                                                                                                                                                                                                                                                                                                                           |
|---------|----------------------------------------------------------------------------------------------------------------------------------------------------------------------------------------------------------------------------------------------------------------------------------------------------------------------|---------------------------------------------------------------------------------------------------------------------------------------------------------------------------------------------------------------------------------------------------------------------------------------------------------------------------------------------------------------------------------------------------------------------------------------------------------------------------------------------------------------------------------------------------------------------------------------------------------------------------------------------------------------------------------------------------------------------------------------------------------------------------------------------------------------------------------------------------------------------------------------------------------------------------------------------------------------------------------------------------|
| 1 (37)  | GO:0030036<br>GO:0030029<br>GO:0007010<br>GO:0007517<br>GO:0001503<br>GO:0001501<br>GO:0060348<br>GO:0060537<br>GO:0051496<br>GO:0007167<br>GO:0045935<br><br>GO:0032233<br>GO:0051173<br>GO:0010557<br>GO:0031328<br>GO:0009891<br>GO:0051492<br>GO:0048008<br>GO:0032231<br>GO:0055010<br>GO:0055008<br>GO:0060415 | Actin cytoskeleton organization<br>Actin filament-based process<br>Cytoskeleton organization<br>Muscle organ development<br>Ossification<br>Skeletal system development<br>Bone development<br>Muscle tissue development<br>Positive regulation of stress fiber formation<br>Enzyme linked receptor protein signaling pathway<br>Positive regulation of nucleobase, nucleoside, nucleotide and nucleic acid metabolic process<br>Positive regulation of actin filament bundle formation<br>Positive regulation of nitrogen compound metabolic process<br>Positive regulation of macromolecule biosynthetic process<br>Positive regulation of cellular biosynthetic process<br>Positive regulation of biosynthetic process<br>Regulation of stress fiber formation<br>Platelet-derived growth factor receptor signaling pathway<br>Regulation of actin filament bundle formation<br>Ventricular cardiac muscle morphogenesis<br>Cardiac muscle tissue morphogenesis<br>Muscle tissue morphogenesis |
| 2 (47)  | GO:0051272<br>GO:0043085<br>GO:0044093                                                                                                                                                                                                                                                                               | Positive regulation of cell motion<br>Positive regulation of catalytic activity<br>Positive regulation of molecular function                                                                                                                                                                                                                                                                                                                                                                                                                                                                                                                                                                                                                                                                                                                                                                                                                                                                      |
| 3 (18)  | GO:0006364<br>GO:0016072                                                                                                                                                                                                                                                                                             | rRNA processing<br>rRNA metabolic process                                                                                                                                                                                                                                                                                                                                                                                                                                                                                                                                                                                                                                                                                                                                                                                                                                                                                                                                                         |
| 4 (29)  | GO:0010558<br>GO:0031327<br>GO:0006350<br>GO:0009890<br>GO:0010605<br>GO:0016481<br>GO:0010629<br>GO:0045934<br>GO:0051172                                                                                                                                                                                           | Negative regulation of macromolecule biosynthetic process<br>Negative regulation of cellular biosynthetic process<br>Transcription<br>Negative regulation of biosynthetic process<br>Negative regulation of macromolecule metabolic process<br>Negative regulation of transcription<br>Negative regulation of gene expression<br>Negative regulation of nucleobase, nucleoside, nucleotide and nucleic acid metabolic process<br>Negative regulation of nitrogen compound metabolic process                                                                                                                                                                                                                                                                                                                                                                                                                                                                                                       |
| 5 (27)  | -                                                                                                                                                                                                                                                                                                                    | -                                                                                                                                                                                                                                                                                                                                                                                                                                                                                                                                                                                                                                                                                                                                                                                                                                                                                                                                                                                                 |
| 6 (40)  | GO:0048147<br>GO:0022613                                                                                                                                                                                                                                                                                             | Negative regulation of fibroblast proliferation<br>Ribonucleoprotein complex biogenesis                                                                                                                                                                                                                                                                                                                                                                                                                                                                                                                                                                                                                                                                                                                                                                                                                                                                                                           |
| 7 (24)  | GO:0019941<br>GO:0043632<br>GO:0051603<br>GO:0044257                                                                                                                                                                                                                                                                 | Modification-dependent protein catabolic process<br>Modification-dependent macromolecule catabolic process<br>Proteolysis involved in cellular protein catabolic process<br>Cellular protein catabolic process                                                                                                                                                                                                                                                                                                                                                                                                                                                                                                                                                                                                                                                                                                                                                                                    |

|         |                                                                                                                            |                                                                                                                                                                                                                                                                                               |
|---------|----------------------------------------------------------------------------------------------------------------------------|-----------------------------------------------------------------------------------------------------------------------------------------------------------------------------------------------------------------------------------------------------------------------------------------------|
|         | GO:0030163<br>GO:0006412<br>GO:0043161<br>GO:0010498<br>GO:0044265<br>GO:0009057<br>GO:0006508<br>GO:0006511               | Protein catabolic process<br>Translation<br>Proteasomal ubiquitin-dependent protein catabolic process<br>Proteasomal protein catabolic process<br>Cellular macromolecule catabolic process<br>Macromolecule catabolic process<br>Proteolysis<br>Ubiquitin-dependent protein catabolic process |
| 8 (47)  | GO:0042273<br>GO:0006396<br>GO:0006400                                                                                     | Ribosomal large subunit biogenesis<br>RNA processing<br>tRNA modification                                                                                                                                                                                                                     |
| 9 (26)  | GO:0043086                                                                                                                 | Negative regulation of catalytic activity                                                                                                                                                                                                                                                     |
| 10 (38) | GO:0007242<br>GO:0015031<br>GO:0045184<br>GO:0008104<br>GO:0001525<br>GO:0010876                                           | Intracellular signaling cascade<br>Protein transport<br>Establishment of protein localization<br>Protein localization<br>Angiogenesis<br>Lipid localization                                                                                                                                   |
| 11 (13) | -                                                                                                                          | -                                                                                                                                                                                                                                                                                             |
| 12 (37) | GO:0006412<br>GO:0006414<br>GO:0051168<br>GO:0042274<br>GO:0000278<br>GO:0006974<br>GO:0006913<br>GO:0051169<br>GO:0022613 | Translation<br>Translational elongation<br>Nuclear export<br>Ribosomal small subunit biogenesis<br>Mitotic cell cycle<br>Response to DNA damage stimulus<br>Nucleocytoplasmic transport<br>Nuclear transport<br>Ribonucleoprotein complex biogenesis                                          |

Table S6: Enriched gene ontology categories for biological processes ( $p$ -value  $< 0.05$ ) of clusters from inferred promoter activity profiles. The number in parentheses in column 1 is the cluster size.



| Cluster | GO ID      | GO TERM                                      |
|---------|------------|----------------------------------------------|
| 1 (37)  | GO:0015629 | Actin cytoskeleton                           |
|         | GO:0005856 | Cytoskeleton                                 |
|         | GO:0043228 | Non-membrane-bounded organelle               |
|         | GO:0043232 | Intracellular non-membrane-bounded organelle |
|         | GO:0030017 | Sarcomere                                    |
|         | GO:0030016 | Myofibril                                    |
|         | GO:0044449 | Contractile fiber part                       |
|         | GO:0043292 | Contractile fiber                            |
|         | GO:0001725 | Stress fiber                                 |
| 2 (47)  | -          | -                                            |
| 3 (18)  | -          | -                                            |
| 4 (29)  | GO:0016604 | Nuclear body                                 |
|         | GO:0005654 | Nucleoplasm                                  |
|         | GO:0030529 | Ribonucleoprotein complex                    |
|         | GO:0044451 | Nucleoplasm part                             |
|         | GO:0031981 | Nuclear lumen                                |
|         | GO:0022625 | Cytosolic large ribosomal subunit            |
| 5 (27)  | GO:0030529 | Ribonucleoprotein complex                    |
|         | GO:0005732 | Small nucleolar ribonucleoprotein complex    |
|         | GO:0043232 | Intracellular non-membrane-bounded organelle |
|         | GO:0043228 | Non-membrane-bounded organelle               |
| 6 (40)  | GO:0044429 | Mitochondrial part                           |
|         | GO:0070013 | Intracellular organelle lumen                |
|         | GO:0043233 | Organelle lumen                              |
|         | GO:0031974 | Membrane-enclosed lumen                      |
|         | GO:0005743 | Mitochondrial inner membrane                 |
|         | GO:0019866 | Organelle inner membrane                     |
|         | GO:0044455 | Mitochondrial membrane part                  |
|         | GO:0033279 | Ribosomal subunit                            |
|         | GO:0031966 | Mitochondrial membrane                       |
|         | GO:0005739 | Mitochondrion                                |
|         | GO:0005740 | Mitochondrial envelope                       |
|         | GO:0005840 | Ribosome                                     |
| 7 (24)  | GO:0005840 | Ribosome                                     |
|         | GO:0033279 | Ribosomal subunit                            |
|         | GO:0030529 | Ribonucleoprotein complex                    |
|         | GO:0000313 | Organelle ribosome                           |
|         | GO:0005761 | Mitochondrial ribosome                       |
| 8 (47)  | GO:0031981 | Nuclear lumen                                |
|         | GO:0005730 | Nucleolus                                    |
|         | GO:0070013 | Intracellular organelle lumen                |
|         | GO:0043233 | Organelle lumen                              |
|         | GO:0031974 | Membrane-enclosed lumen                      |
|         | GO:0030529 | Ribonucleoprotein complex                    |
| 9 (26)  | GO:0031981 | Nuclear lumen                                |

|         |                                                                                                                                                                                                                                                                                      |                                                                                                                                                                                                                                                                                                                                                                                                                                                                                                                                      |
|---------|--------------------------------------------------------------------------------------------------------------------------------------------------------------------------------------------------------------------------------------------------------------------------------------|--------------------------------------------------------------------------------------------------------------------------------------------------------------------------------------------------------------------------------------------------------------------------------------------------------------------------------------------------------------------------------------------------------------------------------------------------------------------------------------------------------------------------------------|
| 10 (38) | GO:0009898<br>GO:0044459                                                                                                                                                                                                                                                             | Internal side of plasma membrane<br>Plasma membrane part                                                                                                                                                                                                                                                                                                                                                                                                                                                                             |
| 11 (13) | GO:0022625<br>GO:0015934<br>GO:0022626                                                                                                                                                                                                                                               | Cytosolic large ribosomal subunit<br>Large ribosomal subunit<br>Cytosolic ribosome                                                                                                                                                                                                                                                                                                                                                                                                                                                   |
| 12 (37) | GO:0005840<br>GO:0033279<br>GO:0030529<br>GO:0043232<br>GO:0043228<br>GO:0044445<br>GO:0005761<br>GO:0000313<br>GO:0015935<br>GO:0015934<br>GO:0031980<br>GO:0005759<br>GO:0022626<br>GO:0005829<br>GO:0070013<br>GO:0043233<br>GO:0031974<br>GO:0005739<br>GO:0000315<br>GO:0005762 | Ribosome<br>Ribosomal subunit<br>Ribonucleoprotein complex<br>Intracellular non-membrane-bounded organelle<br>Non-membrane-bounded organelle<br>Cytosolic part<br>Mitochondrial ribosome<br>Organellar ribosome<br>Small ribosomal subunit<br>Large ribosomal subunit<br>Mitochondrial lumen<br>Mitochondrial matrix<br>Cytosolic ribosome<br>Cytosol<br>Intracellular organelle lumen<br>Organelle lumen<br>Membrane-enclosed lumen<br>Mitochondrion<br>Organellar large ribosomal subunit<br>Mitochondrial large ribosomal subunit |

Table S7: Enriched gene ontology categories for cellular components ( $p$ -value  $< 0.05$ ) of clusters from inferred promoter activity profiles. The number in parentheses in column 1 is the cluster size.

## Clustering the raw ChIP-Seq reads

Pol-II occupancy in the proximal promoter region -250 bp to +750 bp relative to the transcription start site (TSS) was computed in RPM for the 383 genes and the time series grouped into 12 clusters. The clusters are shown in Figure S1. Table S8 shows the significant canonical pathways ( $p$ -value  $< 0.01$ ) and the observed genes in each of the 12 clusters. We find that in this case *JAK1* and *JAK2* appear in different clusters which have different temporal profiles. This may be due to the noisy nature of the data and the inclusion of paused pol-II in the proximal region time series. Our model which has the potential to uncover the signal due to pol-II that is engaged in transcription could be useful in uncovering relationships which may be missed if we only consider the raw ChIP-seq reads.

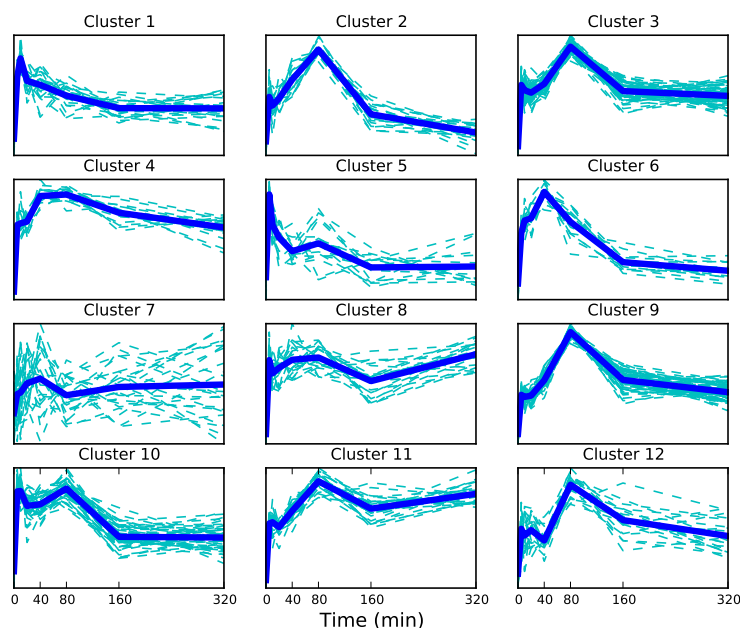

Figure S1: Clusters of promoter activity profiles derived directly from the raw ChIP-seq reads. The mean profile in each cluster is shown by the bold line.

| Cluster | Canonical pathway                                                                                                 | Genes                             |
|---------|-------------------------------------------------------------------------------------------------------------------|-----------------------------------|
| 1 (24)  | Transcriptional activation of dbpB from mRNA                                                                      | PDGFB                             |
| 2 (23)  | -                                                                                                                 | -                                 |
| 3 (75)  | Hypoxia and p53 in the cardiovascular system                                                                      | GADD45A, HIF1A                    |
| 4 (18)  | Generation of amyloid b-peptide by ps1                                                                            | ATP5G3                            |
| 5 (16)  | PDGFR-alpha signaling pathway<br>IFN gamma signaling pathway<br>IL-6 signaling pathway<br>IL-10 signaling pathway | SHB, JAK1<br>JAK1<br>JAK1<br>JAK1 |
| 6 (15)  | -                                                                                                                 | -                                 |
| 7 (24)  | -                                                                                                                 | -                                 |
| 8 (24)  | -                                                                                                                 | -                                 |
| 9 (67)  | Proteasome complex                                                                                                | PSME1, PSMB5, PSMA4               |
| 10 (49) | TPO signaling pathway                                                                                             | JAK2                              |
| 11 (29) | Glypican 3 network<br>Sonic hedgehog receptor ptc1 regulates cell cycle                                           | SHH<br>SHH                        |
| 12 (19) | Hypoxia-inducible factor in the cardiovascular system<br>Fibrinolysis pathway                                     | LDHA<br>ATP2A2                    |

Table S8: Pathway analysis of clusters from raw ChIP-seq reads in the proximal promoter region -250bp to +750bp from the TSS. The number in parentheses in column 1 is the cluster size.

## Transcription Factor Binding

### Motifs

Tullai *et al.* [9] investigated genes that are co-regulated by shared transcription factor binding sites (TFBS). In particular, they found certain TFBS were enriched in the promoters of early response

genes. We therefore investigated whether the promoters of genes in the different promoter profile clusters are enriched for different TFs. We use Pscan [10] to look for enriched TF motifs among those available in JASPAR [11]. The proximal promoter region -450 bp to +50 bp relative to the TSS of the genes in each cluster was analyzed. Table S9 shows significantly enriched TFBS in each cluster ( $p$ -value  $< 0.05$ ). Shown are TFs whose binding sites are over-represented in at least 5 clusters. The estrogen response element (ERE) is enriched in five clusters (1, 2, 5, 6 and 10), indicating that our modelling identifies estrogen responsive regions. The clusters containing an ERE have mean promoter activity profiles with distinct early peaks followed by decrease in activity which suggests transient activity. Additionally, clusters 1, 2 and 10 have relatively early peaks.

| TF                           | Cluster |   |   |   |   |   |   |   |   |    |    |    |
|------------------------------|---------|---|---|---|---|---|---|---|---|----|----|----|
|                              | 1       | 2 | 3 | 4 | 5 | 6 | 7 | 8 | 9 | 10 | 11 | 12 |
| GABPA                        | ✓       | ✓ | ✓ | ✓ | ✓ | - | ✓ | ✓ | ✓ | -  | ✓  | ✓  |
| Zfx                          | ✓       | ✓ | - | ✓ | ✓ | - | - | ✓ | ✓ | ✓  | ✓  | ✓  |
| Klf4                         | ✓       | ✓ | - | ✓ | - | - | ✓ | ✓ | ✓ | ✓  | -  | ✓  |
| ELK1                         | ✓       | - | - | ✓ | ✓ | - | ✓ | ✓ | ✓ | -  | ✓  | ✓  |
| HIF1A::ARNT                  | ✓       | ✓ | - | ✓ | ✓ | ✓ | ✓ | - | - | ✓  | ✓  | -  |
| ELK4                         | ✓       | - | ✓ | ✓ | ✓ | - | ✓ | ✓ | ✓ | -  | -  | ✓  |
| SP1                          | ✓       | ✓ | - | ✓ | - | - | - | ✓ | ✓ | ✓  | -  | ✓  |
| TFAP2A                       | ✓       | ✓ | - | ✓ | - | ✓ | - | ✓ | - | ✓  | -  | -  |
| Mycn                         | ✓       | - | - | ✓ | ✓ | - | - | ✓ | - | ✓  | ✓  | -  |
| Myc                          | ✓       | - | - | ✓ | ✓ | - | - | ✓ | - | ✓  | ✓  | -  |
| Pax5                         | ✓       | ✓ | - | ✓ | - | - | - | - | - | ✓  | -  | ✓  |
| <b>ER<math>\alpha</math></b> | ✓       | ✓ | - | - | ✓ | ✓ | - | - | - | ✓  | -  | -  |
| Arnt::Ahr                    | -       | ✓ | - | ✓ | - | - | ✓ | ✓ | - | ✓  | -  | -  |

Table S9: Significantly over-represented ( $p$ -value  $< 0.05$ ) transcription factor binding sites in the promoter profile clusters. We use Pscan to look for enriched TF motifs among those available in JASPAR. The proximal promoter region -450 bp to +50 bp relative to the TSS of the genes in each cluster was analyzed.

Next we investigated the EREs in the genes belonging to the 5 clusters enriched for the ERE motif. For each promoter sequence, the best sequence match to the ERE position frequency matrix (PFM) in JASPAR (MA0112.2) was determined. We keep those sequences with a matrix score greater than the mean score for matches found in the promoter sequences over the whole genome (For the ERE PFM this value is 0.73 when we consider the region -450 bp to +50 bp relative to the TSS). We used these sequences to determine the consensus ERE motif in this group of genes. To determine the consensus sequence, we report a single nucleotide for a given position if the nucleotide has a frequency greater than 50% and a frequency twice as large as the next nucleotide. We obtain a consensus sequence of 5'-GGnCACCCCTGnCC-3' (where n is any nucleotide) and an average matrix score of 0.77. The sequence is visualised in Figure S2 (A). The sequence of the ERE is known and given as 5'-GGTCAnnnTGACC-3' [12, 13]. The sequence corresponding to the PFM MA0112.2 is visualised in Figure S2 (B). We see that the ERE motif we obtain agrees well with the known motif.

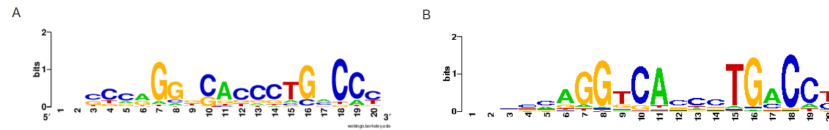

Figure S2: Consensus sequence of regions matching the ERE motif in the promoter profile clusters enriched for the ERE motif (A) and the Estrogen Response Element (B).

Table S10 shows the EREs in each of the 5 clusters visualised using WebLogo. We also show the consensus sequence and the average matrix score. To determine the consensus sequence, we report a single nucleotide for a given position if the nucleotide has a frequency greater than 50% and a frequency twice as large as the next nucleotide. We see that there is some diversity in the motifs corresponding to different clusters but the consensus sequences agree with the known motif. Differences appear at at most 3 positions with the consensus sequence for cluster 10 differing at only two positions. We see that for the half site ‘TGACC’ the ‘A’ does not appear in the consensus sequence in all the clusters.

## Transcription factor binding

Determining the TFBS motifs enriched in each cluster provides a way to determine the influence of TFs on transcription. As a complementary approach, we also investigated the TF peaks in regions ranging from 1 to 100 kb around the gene transcription start site for all genes in each cluster using ChIP-seq data for a number of TFs measured under similar experimental conditions (i.e. MCF-7 breast cancer cells treated with E2) in the cistrome database (<http://cistrome.org>).

Tables S11 to S14 show the number of genes with TF binding peaks for regions around the TSS ranging from 1 to 100 kb for each cluster for 7 TFs namely ER $\alpha$  [14], FoxA1 [15], c-Fos [16], c-Jun [16], c-MYC [17], SRC-3 [18], TRIM24 [19]. In the tables, statistically significant ( $p$ -value  $< 0.05$ ) proportions are indicated in red (larger than expected) and green (lower than expected) with associated  $p$ -values in parentheses. These  $p$ -values are obtained empirically by drawing 1e6 samples from a hypergeometric distribution.

We investigated the overlap of the binding sites for ER $\alpha$  and FOXA1 both in the 151 genes belonging to the rapid response genes in clusters 1, 2, 4, and 10 and genome-wide using the peaks obtained from [14] (ER $\alpha$ ) and [15] (FOXA1) and reported in the cistrome database. We investigated regions around the TSS ranging from 2 to 100 kb. Tables S15-S18 show the number of ER $\alpha$  and FOXA1 peaks and the overlap. The statistical significance is determined by comparing the overlap in random gene lists of the same size.

| Cluster | ERE Motif                                                                           | Consensus sequence | Average Matrix Score |
|---------|-------------------------------------------------------------------------------------|--------------------|----------------------|
| 1       | 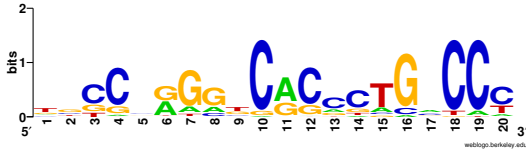   | GnnCACCTGnCCC      | 0.772                |
| 2       |    | GGnnACCCTGnCCn     | 0.77                 |
| 5       |   | GGnnAnCCTGnCCn     | 0.761                |
| 6       |  | GGnnACCnTGnCCn     | 0.762                |
| 10      |  | GGnCACCTGnCCn      | 0.765                |

Table S10: Analysis of the ERE in promoter regions of gene clusters obtained from inferred promoter activity profiles. The EREs in each of the 5 clusters are visualised using WebLogo (<http://weblogo.berkeley.edu/>). The consensus sequence is shown from position 7 which corresponds to the known ERE motif. The average matrix score is computed using the sequence matrix scores from Pscan.

| Cluster | TFs         |         |         |         |         |         |        |
|---------|-------------|---------|---------|---------|---------|---------|--------|
|         | ER $\alpha$ | FOXA1   | c-FOS   | c-JUN   | MYC     | SRC-3   | TRIM24 |
| 1 (37)  | 5           | 4       | 2       | 3       | 1       | 7       | 9      |
| 2 (47)  | 9 (*)       | 3       | 2       | 2       | 4       | 12 (*)  | 10     |
| 3 (18)  | 3           | 2       | 2       | 1       | 3 (*)   | 3       | 2      |
| 4 (29)  | 4           | 2       | 1       | 0 (***) | 0 (***) | 3       | 5      |
| 5 (27)  | 3           | 0 (***) | 0 (***) | 5 (*)   | 4 (*)   | 7       | 5      |
| 6 (40)  | 5           | 3       | 3       | 0 (***) | 3       | 8       | 2      |
| 7 (24)  | 1           | 2       | 0 (***) | 3       | 1       | 6       | 7      |
| 8 (47)  | 3           | 2       | 1       | 3       | 4       | 6       | 14 (*) |
| 9 (26)  | 2           | 2       | 4       | 5 (**)  | 1       | 5       | 6      |
| 10 (38) | 9 (*)       | 2       | 1       | 0 (***) | 0 (***) | 3       | 9      |
| 11 (13) | 0 (***)     | 0 (***) | 3       | 1       | 1       | 1       | 1      |
| 12 (37) | 5           | 0 (***) | 2       | 5 (*)   | 2       | 11 (**) | 7      |

Table S11: Analysis of transcription factor binding in 1kbp regions of genes in gene clusters obtained from inferred promoter activity profiles. The number in parentheses in the first column is the cluster size. For each TF, we show the number of genes with peaks. Statistically significant proportions ( $p$ -value  $< 0.05$ ) are indicated in red (larger than expected). For  $p$ -values less than 0.01, the associated  $p$ -values are indicated in parentheses according to the following scale (\*\*\*:  $p < 0.0001$ , \*\*:  $p < 0.001$ , \*:  $p < 0.01$ ).

| Cluster | TFs         |         |         |         |         |         |         |
|---------|-------------|---------|---------|---------|---------|---------|---------|
|         | ER $\alpha$ | FOXA1   | c-FOS   | c-JUN   | MYC     | SRC-3   | TRIM24  |
| 1 (37)  | 8           | 4       | 3       | 3       | 1       | 8       | 10      |
| 2 (47)  | 10          | 3       | 3       | 2       | 5 (*)   | 14 (**) | 11      |
| 3 (18)  | 3           | 2       | 2       | 1       | 3       | 3       | 3       |
| 4 (29)  | 4           | 2       | 1       | 0 (***) | 0 (***) | 3       | 9       |
| 5 (27)  | 4           | 0 (***) | 1       | 5 (*)   | 6 (***) | 8       | 6       |
| 6 (40)  | 9           | 5       | 5       | 0 (***) | 3       | 11 (*)  | 3       |
| 7 (24)  | 2           | 3       | 0 (***) | 3       | 1       | 7       | 10 (*)  |
| 8 (47)  | 5           | 2       | 1       | 4       | 4       | 9       | 19 (**) |
| 9 (26)  | 3           | 2       | 6 (*)   | 6 (**)  | 1       | 7       | 7       |
| 10 (38) | 11 (*)      | 3       | 2       | 0 (***) | 1       | 5       | 10      |
| 11 (13) | 1           | 0 (***) | 3       | 1       | 1       | 1       | 3       |
| 12 (37) | 6           | 0 (***) | 2       | 5 (*)   | 2       | 11 (*)  | 8       |

Table S12: Analysis of transcription factor binding in 2kbp regions.

| Cluster | TFs         |         |       |         |         |          |         |
|---------|-------------|---------|-------|---------|---------|----------|---------|
|         | ER $\alpha$ | FOXA1   | c-FOS | c-JUN   | MYC     | SRC-3    | TRIM24  |
| 1 (37)  | 20 (*)      | 9       | 8     | 4       | 1       | 18       | 22      |
| 2 (47)  | 24 (*)      | 13      | 12    | 6       | 7 (*)   | 30 (***) | 28      |
| 3 (18)  | 4           | 4       | 4     | 2       | 5 (*)   | 8        | 7       |
| 4 (29)  | 11          | 6       | 4     | 2       | 1       | 12       | 18      |
| 5 (27)  | 9           | 2       | 3     | 6 (*)   | 8 (***) | 11       | 14      |
| 6 (40)  | 22 (**)     | 8       | 6     | 4       | 3       | 18       | 24      |
| 7 (24)  | 7           | 4       | 2     | 4       | 2       | 13       | 16      |
| 8 (47)  | 21          | 6       | 7     | 10 (*)  | 7 (*)   | 28 (***) | 34 (**) |
| 9 (26)  | 10          | 4       | 8     | 9 (***) | 1       | 8        | 20 (*)  |
| 10 (38) | 26 (***)    | 11      | 9     | 0 (***) | 1       | 21 (*)   | 24      |
| 11 (13) | 4           | 0 (***) | 5     | 2       | 1       | 4        | 8       |
| 12 (37) | 12          | 2       | 7     | 10 (**) | 4       | 20 (*)   | 23      |

Table S13: Analysis of transcription factor binding in 20kbp regions.

| Cluster | TFs         |         |          |         |         |         |        |
|---------|-------------|---------|----------|---------|---------|---------|--------|
|         | ER $\alpha$ | FOXA1   | c-FOS    | c-JUN   | MYC     | SRC-3   | TRIM24 |
| 1 (37)  | 29          | 20      | 26 (***) | 12      | 4       | 32 (*)  | 36     |
| 2 (47)  | 41 (*)      | 26      | 23       | 11      | 12 (*)  | 43 (**) | 43     |
| 3 (18)  | 17          | 7       | 10       | 6       | 6       | 14      | 16     |
| 4 (29)  | 29 (***)    | 17      | 15       | 10      | 5       | 25      | 28     |
| 5 (27)  | 21          | 8       | 11       | 12 (*)  | 11 (**) | 19      | 24     |
| 6 (40)  | 36 (*)      | 15      | 19       | 11      | 6       | 35 (*)  | 38     |
| 7 (24)  | 15          | 11      | 8        | 9       | 5       | 18      | 22     |
| 8 (47)  | 42 (**)     | 20      | 22       | 15      | 9       | 41 (*)  | 45     |
| 9 (26)  | 23          | 15      | 16 (*)   | 12 (**) | 5       | 22      | 24     |
| 10 (38) | 34 (*)      | 27 (**) | 20       | 5       | 4       | 34 (*)  | 36     |
| 11 (13) | 9           | 4       | 8        | 4       | 2       | 10      | 13     |
| 12 (37) | 31          | 11      | 19       | 14 (*)  | 5       | 28      | 35     |

Table S14: Analysis of transcription factor binding in 100kbp regions.

| Genes                          | # of ER $\alpha$ peaks | # of FOXA1 peaks | ER $\alpha$ and FOXA1 overlap |
|--------------------------------|------------------------|------------------|-------------------------------|
| Clusters 1, 2, 4, and 10 (151) | 28 (12)                | 11 (6)           | 7 (0.042)                     |
| All genes ( $\sim$ 20,000)     | 1596                   | 758              | 130                           |

Table S15: Overlap of ER $\alpha$  and FOXA1 binding in a 1 kb region around the TSS. The numbers in parentheses in the first column are the number of genes. In each TF peak column, we show the expected number of peaks in a set of random random genes of the same size in parentheses. In the overlap column the associated p-value is shown in parentheses.

| Genes                          | # of ER $\alpha$ peaks | # of FOXA1 peaks | ER $\alpha$ and FOXA1 overlap |
|--------------------------------|------------------------|------------------|-------------------------------|
| Clusters 1, 2, 4, and 10 (151) | 36 (17)                | 13 (7)           | 8 (0.038)                     |
| All genes ( $\sim$ 20,000)     | 2220                   | 929              | 177                           |

Table S16: Overlap of ER $\alpha$  and FOXA1 binding in a 2 kb region around the TSS.



| Genes                          | # of ER $\alpha$ peaks | # of FOXA1 peaks | ER $\alpha$ and FOXA1 overlap |
|--------------------------------|------------------------|------------------|-------------------------------|
| Clusters 1, 2, 4, and 10 (151) | 125 (63)               | 44 (26)          | 19 (0.045)                    |
| All genes ( $\sim$ 20,000)     | 7229                   | 2991             | 626                           |

Table S17: Overlap of ER $\alpha$  and FOXA1 binding in a 20 kb region around the TSS.

| Genes                          | # of ER $\alpha$ peaks | # of FOXA1 peaks | ER $\alpha$ and FOXA1 overlap |
|--------------------------------|------------------------|------------------|-------------------------------|
| Clusters 1, 2, 4, and 10 (151) | 488 (254)              | 171 (100)        | 66 (0.006)                    |
| All genes ( $\sim$ 20,000)     | 17942                  | 7927             | 1691                          |

Table S18: Overlap of ER $\alpha$  and FOXA1 binding in a 100 kb region around the TSS.

## References

- [1] Maiuri P, Knezevich A, De Marco A, Mazza D, Kula A, et al. (2011) Fast transcription rates of RNA polymerase II in human cells. *EMBO Rep* .
- [2] Neal RM (2011) MCMC using Hamiltonian dynamics. In: S Brooks, A Gelman, G Jones and X-L Meng, editor, *Handbook of Markov Chain Monte Carlo*, Chapman and Hall/CRC.
- [3] The Cancer Genome Atlas Network (2012) Comprehensive molecular portraits of human breast tumours. *Nature* 490: 61–70.
- [4] Hurtado A, Holmes KA, Ross-Innes CS, Schmidt D, Carroll JS (2011) FOXA1 is a key determinant of estrogen receptor function and endocrine response. *Nature Genetics* 43: 27–33.
- [5] Carroll JS, Meyer CA, Song J, Li W, Geistlinger TR, et al. (2006) Genome-wide analysis of estrogen receptor binding sites. *Nature Genetics* 38: 1289–1297.
- [6] Jagannathan V, Robinson-Rechavi M (2011) Meta-analysis of estrogen response in MCF-7 distinguishes early target genes involved in signaling and cell proliferation from later target genes involved in cell cycle and DNA repair. *BMC Syst Biol* 5: 138.
- [7] Huang DW, Sherman BT, Lempicki RA (2008) Systematic and integrative analysis of large gene lists using DAVID bioinformatics resources. *Nat Protocols* 4: 44–57.
- [8] Huang DW, Sherman BT, Lempicki RA (2009) Bioinformatics enrichment tools: paths toward the comprehensive functional analysis of large gene lists. *Nucleic Acids Research* 37: 1–13.
- [9] Tullai JW, Schaffer ME, Mullenbrock S, Sholder G, Kasif S, et al. (2007) Immediate-early and delayed primary response genes are distinct in function and genomic architecture. *J Biol Chem* 282: 23981-95.
- [10] Zambelli F, Pesole G, Pavesi G (2009) Pscan: finding over-represented transcription factor binding site motifs in sequences from co-regulated or co-expressed genes. *Nucleic Acids Research* 37: 247-252.
- [11] Sandelin A, Alkema W, Engström P, Wasserman WW, Lenhard B (2004) JASPAR: an openaccess database for eukaryotic transcription factor binding profiles. *Nucleic Acids Research* 32: D91–D94.
- [12] Klinge CM (2001) Estrogen receptor interaction with estrogen response elements. *Nucleic Acids Research* 29: 2905-2919.
- [13] Welboren WJ, Stunnenberg HG, Sweep FCGJ, Span PN (2007) Identifying estrogen receptor target genes. *Molecular oncology* 1: 138–143.
- [14] Welboren WJ, van Driel MA, Janssen-Megens EM, van Heeringen SJ, Sweep FCGJ, et al. (2009) ChIP-Seq of ER $\alpha$  and RNA polymerase II defines genes differentially responding to ligands. *The EMBO Journal* 28: 1418–1428.
- [15] Lupien M, Eeckhoutte J, Meyer CA, Wang Q, Zhang Y, et al. (2008) FoxA1 translates epigenetic signatures into enhancer-driven lineage-specific transcription. *Cell* 132: 958–970.
- [16] Joseph R, Orlov YL, Huss M, Sun W, Kong SLL, et al. (2010) Integrative model of genomic factors for determining binding site selection by estrogen receptor  $\alpha$ . *Molecular systems biology* 6: 456.
- [17] Hua S, Kittler R, White KP (2009) Genomic antagonism between retinoic acid and estrogen signaling in breast cancer. *Cell* 137: 1259–1271.
- [18] Lanz RB, Bulynko Y, Malovannaya A, Labhart P, Wang L, et al. (2010) Global Characterization of Transcriptional Impact of the SRC-3 Coregulator. *Molecular Endocrinology* 24: 859-872.
- [19] Tsai WW, Wang Z, Yiu TT, Akdemir KC, Xia W, et al. (2010) TRIM24 links a non-canonical histone signature to breast cancer. *Nature* 468: 927–932.
